# Supplementary material
Source: publisher site journal article supplement (https://www.dovepress.com/article/570142)
Supplement: Supplementary file 1 [file 570142_Supplementary%20files%20.docx]

Table S1 Comparison of discordant results between ddPCR and blood culture.

| Sample ID | ddPCR results | Blood culture results |
| --- | --- | --- |
| dd08 | *Klebsiella pneumoniae* (1238.85 copies/mL)  *Acinetobacter baumannii* (54 copies/mL)  *bla*KPC (618.3 copies/mL) | carbapenem-resistant *Klebsiella pneumoniae* |
| dd09 | *Acinetobacter baumannii* (42.3 copies/mL)  *Enterococcus* spp (49.05 copies/mL) | Negative |
| dd10 | *Escherichia coli* (146173.5 copies/mL) | Negative |
| dd13 | *Stenotrophomonas maltophilia (*149.4 copies/mL) | Negative |
| dd14 | *Klebsiella pneumoniae* (6178.95 copies/mL)  *Pseudomonas aeruginosa* ( 142.5 copies/mL)  *Acinetobacter baumannii* (55.3 copies/mL)  *bla*KPC (1372.05 copies/mL) | carbapenem-resistant *Klebsiella pneumoniae* |
| dd21 | *Escherichia coli* (105034.5‬ copies/mL) | Negative |
| dd23 | *Klebsiella pneumoniae* (49.95 copies/mL)  *bla*KPC (36 copies/mL) | Negative |
| dd24 | *Klebsiella pneumoniae* (6002.1 copies/mL) | Negative |
| dd28 | *Staphylococcus aureus* (250.2 copies/mL) | Negative |
| dd34 | *Escherichia coli* (129.6‬ copies/mL)  coagulase-negative *Staphylococci* ( 92.25 copies/mL) | Negative |
| dd39 | *Streptococcus* spp. (108.45‬ copies/mL) | Negative |
| dd40 | *Staphylococcus aureus* (45 copies/mL) | Negative |
| dd41 | *Pseudomonas aeruginosa* (48.51 copies/mL) | Negative |
| dd42 | *Acinetobacter baumannii* (39.5 copies/mL) | Negative |
| dd48 | *Candida* spp. (57.5 copies/mL) | Negative |
| dd52 | *Escherichia coli* (11571‬ copies/mL) | Negative |
| dd54 | Negative | *Streptococcus sanguinis* |
| dd57 | *Klebsiella pneumoniae* (8586 copies/mL) | Negative |
| dd58 | Negative | *Aeromonas veronii* |
| dd60 | *Klebsiella pneumoniae* (475 copies/mL) | Negative |
| dd61 | *Staphylococcus aureus* (35 copies/mL) | Negative |
| dd62 | *Klebsiella pneumoniae* (59 copies/mL) | Negative |
| LH1 | *Klebsiella pneumoniae* (164 copies/mL) | Negative |
| LH6 | *Staphylococcus aureus* (55 copies/mL)  *Enterococcus* spp (4003 copies/mL) | *Enterococcus faecium* |

Table S2 Blood samples positive for antibiotic resistance genes detected by ddPCR, with matched blood culture results.

| Sample ID | ddPCR results | Blood culture results |
| --- | --- | --- |
| dd03 | *Staphylococcus aureus* （2389.5 copies/mL）  *mecA* (3976.2 copies/mL) | methicillin-resistant *Staphylococcus aureus* |
| dd08 | *Klebsiella pneumoniae* (1238.85 copies/mL)  *Acinetobacter baumannii* (54 copies/mL)  *bla*KPC (618.3 copies/mL) | carbapenem-resistant *Klebsiella pneumoniae* |
| dd14 | *Klebsiella pneumoniae* (6178.95 copies/mL)  *Pseudomonas aeruginosa* ( 142.5 copies/mL)  *Acinetobacter baumannii* (55.3 copies/mL)  *bla*KPC (1372.05 copies/mL) | carbapenem-resistant *Klebsiella pneumoniae* |
| dd23 | *Klebsiella pneumoniae* (49.95 copies/mL)  *bla*KPC (36 copies/mL) | Negative |
| dd44 | *Klebsiella pneumoniae* (11204.55 copies/mL)  *bla*KPC (5690.7 copies/mL) | carbapenem-resistant *Klebsiella pneumoniae* |

Table S3 Antimicrobial susceptibility testing results of three CRKP strains

| Antibiotics | Strain 1 | Strain 2 | Strain 3 |
| --- | --- | --- | --- |
| Ampicillin | ≥32μg/ml, R | ≥32μg/ml, R | ≥32μg/ml, R |
| Ampicillin/Sulbactam | ≥32μg/ml, R | ≥32μg/ml, R | ≥32μg/ml, R |
| Kanamycin | ≤2μg/ml, S | ≥64μg/ml, R | ≤2μg/ml, S |
| Aztreonam | ≥64μg/ml, R | ≥64μg/ml, R | ≥64μg/ml, R |
| Ciprofloxacin | ≥4μg/ml, R | ≥4μg/ml, R | ≥4μg/ml, R |
| Cefotetan | ≥64μg/ml, R | ≥64μg/ml, R | ≥64μg/ml, R |
| Ceftriaxone | ≥64μg/ml, R | ≥64μg/ml, R | ≥64μg/ml, R |
| Cefazolin | ≥64μg/ml, R | ≥64μg/ml, R | ≥64μg/ml, R |
| Cefepime | ≥64μg/ml, R | ≥64μg/ml, R | ≥64μg/ml, R |
| Gentamicin | ≥16μg/ml, R | ≥16μg/ml, R | ≤1μg/ml, S |
| Imipenem | ≥16μg/ml, R | ≥16μg/ml, R | ≥16μg/ml, R |
| Levofloxacin | ≥8μg/ml, R | ≥8μg/ml, R | ≥8μg/ml, R |
| Trimethoprim/sulfamethoxazole | ≥320μg/ml, R | ≤20μg/ml, S | ≥320μg/ml, R |
| Ceftazidime | ≥64μg/ml, R | ≥64μg/ml, R | ≥64μg/ml, R |
| Tobramycin | ≥16μg/ml, R | ≥16μg/ml, R | ≤1μg/ml, S |
| Piperacillin/Tazobactam | ≥128μg/ml, R | ≥128μg/ml, R | ≥128μg/ml, R |
| Nitrofurantoin | 256μg/ml, R | ≥512μg/ml, R | 256μg/ml, R |
| Ertapenem | ≥8μg/ml, R | ≥8μg/ml, R | ≥8μg/ml, R |
| Cefoperazone/sulbactam (K-B method) | 6mm, R | 6mm, R | 6mm, R |
| Meropenem (K-B method) | 6mm, R | 6mm, R | 6mm, R |
